# Supplementary material for: Antigenotoxic and cosmetic potential of elderberry (Sambucus nigra) extract: protection against oxidative DNA damage
Source: Royal Society of Chemistry journal article supplement (doi:10.1039/d4fo03217a), 2024-01-01
Supplement: d4fo03217a1.pdf [file d4fo03217a1.pdf]

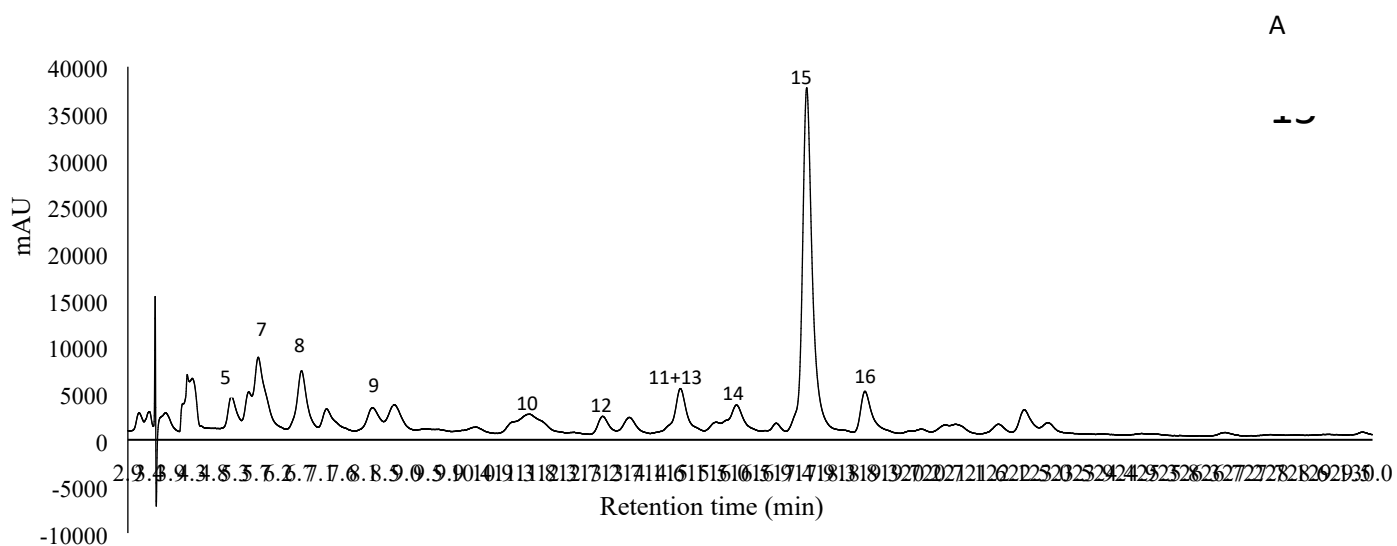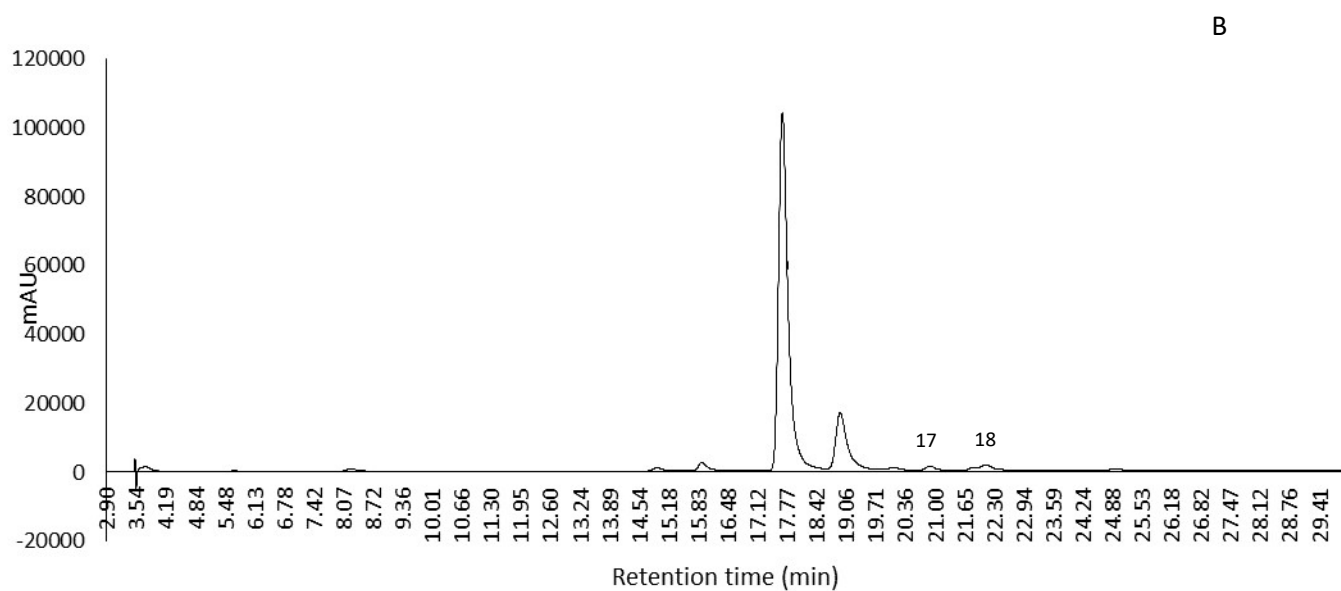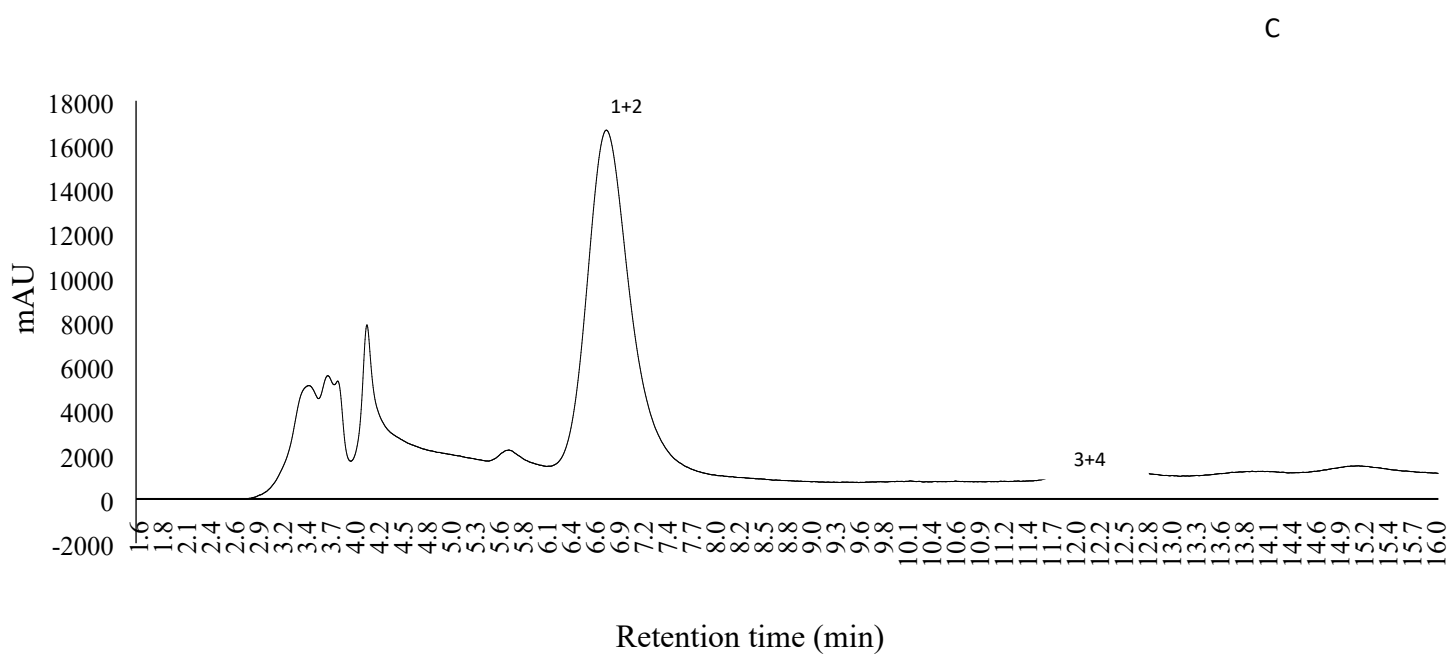

**Figure S1.** Representative chromatograms of elderberry sample at (a) 280 nm, (b) 370 nm, and (c) 520 nm. Peak names are given in Table 1.
